# Supplementary material for: Bone Mineral Density and Radiographic Knee Osteoarthritis in Elderly Hakka Women: Ethnic-Specific Insights from an Aged Population
Source: Research Square preprint supplement (doi:10.21203/rs.3.rs-7355976/v1), 2025-09-02
Supplement: Supplementary file 1 [file a748f91801b95625500b64e1.xlsx]

## Sheet: 工作表1
年齡	身高	體重	BMI	骨密L1	L2	L3	L4	骨密L-spine	全部左	全部右	膝關節炎
87	150	50	22.2222	-2.1	-3.3	-2.9	-1.6	-2.475	-1.9	-2.7
70	151	53	23.2446	-1.9	-2.5	-1.6	-0.7	-1.675	-0.8	-0.8
72	153	53	22.6409	-2	-1.2	-0.2	-0.3	-0.925	-0.3	-0.4
66	159	55	21.7555	-1.3	-1.6	-0.9	-0.9	-1.175	-1.7	-1.7
78	166	90	32.6608	1.1	1.2	0.2	-0.5	0.5	0.3	0.6	y
77	153	54	23.0681	-0.8	-0.2	1.1	0.8	0.225	-0.6	-1.5
78	162	60	22.8624	-1.7	-3.3	-3	-2.3	-2.575	-3	-2.6
80	145	48	22.83	-2.9	-4.2	-3.7	-3.3	-3.525	-2.4	-2.2	y
72	150	57	25.3333	-2.6	-2.9	-1.9	-2.2	-2.4	-2.6	-2.3	y
90	150	50	22.2222	-1.7	-1.5	-2.7	-3	-2.225	2	-1.3
96	155	75	31.2175	-2.4	-3.9	-3.6		-3.3	-4.1	-7	y
69	159	54	21.3599	-1.9	-1.7	-1.7	-1.5	-1.7	-1.3	-1.1
92	140	52	26.5306	-0.5	-3.5	-3.7	-1.1	-2.2	-2.6	-2.2
95	151	54	23.6832	-3.3	-4.7	-4.4	-3.5	-3.975	-3.6	-3.3
86	155	60	24.974	-0.6	-2.5	0.5	1	-0.4	-1.6	-1.9
74	147	52	24.064	-1.7	-1.6	-0.2	-0.9	-1.1	-1.5	-1.7
67	166	42	15.2417	-2.8	-2.9	-2	-2.1	-2.45	-2.5	-2.6
97	151	40	17.5431	-4.6	-4.2	-3.7	-3.2	-3.925	-4	-4.2
88	146	33	15.4813	-4.1	-4.1	-4.6	-5.5	-4.575	-3.2	-4.3
77	153	60	25.6312		-0.1	-1.8	-1.4	-1.1	-1.3	-1.9	y
84	160	68	26.5625	-1.9	-0.3	0	0.6	-0.4	-1.1	-1.3
87	151	58	25.4375	-4.2	-4.1	-3.7	-2	-3.5	-2.4	-2
90	137	33	17.5822	-3.2	-2.6	-1.8	-2	-2.4	-3.8	-3.3	y
88	150	45	20	-2.1	-2.9	-2.9	-2.1	-2.5	-2.4	-3.3
81	145	42	19.9762	-2.3	-4	-3.2	-3.4	-3.225	-5.1	-0.5
89	155	50	20.8117	-2.6	-2.6	-3.6	-2	-2.7	-3	-2.7
88	146	47	22.0492	-2.3	-5.1	-4.2	-3.7	-3.825	-2.6	-2.4
75	147	47	21.7502	-2.1	-2.3	-1.2	-1.9	-1.875	-2.6	-2.9
95	150	45	20	-3.7	-3.2	-2.4	-1.8	-2.775	-3.3	-2.9
89	145	66	31.3912	-2.3	-2.4	-3.1	-6.2	-3.5	-1.7	-2.9
87	150	45	20	-1.5	1.1	0.4	-0.8	-0.2	-1.8	-1.6
80	158	61	24.4352	-2	-2.1	-1.5	-2.6	-2.05	-2.9	-2.6	y
71	166	67	24.3141	-1.9	-3.3	-2.2	-1.5	-2.225	-2	-2.5	y
78	155	52	21.6441	-2.1	-1.8	-1.9	-2.1	-1.975	-1.6	-1.6
88	160	56	21.875	-2.1	-2.8	-3.1	-2.6	-2.65	-1.7	-2.2	y
81	150	71	31.5556	-1.3	-2.1	-1	1	-0.85	-1.2	-0.7	y
91	146	60	28.1479	-2.7	-2.6	-2.4	-1.8	-2.375	-0.9	-1.1	y
85	149	64	28.8275	0.9		1	-3	-0.366667	-1.6	-1.7	y
82	145	52	24.7325	-3.8	-4.6	-4	-3	-3.85	-2.5	-2.2
100	155	40	16.6493	-4.3	-4.5	-3.6	-4.2	-4.15	-4.7	-4.4
80	150	64	28.4444	-2.2	-1.4	-0.3	-0.3	-1.05	-1.6	-2.1
79	155	63	26.2227	-1.1	-1.1	-1.1	-2.5	-1.45	-1.6	-2.6	y
66	149	59	26.5754	-1.9	-1.7	-0.3	-0.8	-1.175	-1.4	-1.2
76	157	55	22.3133	-3.1	-3.2	-2.6	-2.5	-2.85	-1.6	-1.3
87	145	63	29.9643	-0.7	-2.4	-2.6	-2.6	-2.075	-2.8	-2.5
79	150	65	28.8889	-2.2	-2.7	-1.7	-1.9	-2.125	0	0.3
68	157	76	30.8329	-2.4	-2	-1.4	-1.8	-1.9	-1.5	-1.4
85	160	75	29.2969	-0.8	-0.7	-1.4	-2.6	-1.375	-2.1	-2.1
68	158	43	17.2248	-4.9	-5.4	-4.7	-3.4	-4.6	-4.1	-4.3
82	156	65	26.7094	-0.2	-0.6	0.7	0.4	0.075	-1.6	-1.2
86	155	56	23.3091	-1.7	-3.7	-2.2	-2.1	-2.425	-2.7	-3.6
67	155	45	18.7305	-2.5	-2.8	-3.1	-3.2	-2.9	-3.1	-3
89	150	50	22.2222	-2.9	-3.9	-3.4	-3	-3.3	-2.7	-2.3
73	156	60	24.6548	-3.5	-3.6	-2.2	-2.6	-2.975	-2.2	-2.3
93	154	44	18.5529	-4.7	-5.6	-5.4	-4.9	-5.15	-6.2	-4
68	141	39	19.6167	-0.3	-4.4	-3.3	-3.5	-2.875	-4.2	-4.4
70	145	51	24.2568	-3.4	-3.7	-3.7	-3.6	-3.6	-2.3	-2.1
88	145	60	28.5375	-2.2	-2	2.3	2.6	0.175	-1.8	-2.2	y
75	154	73	30.7809	-3	-3.8	-3.6	-2.9	-3.325	-2.5	-2.2	y
65	147	79	36.5588	-0.3	-0.2	0.2	-0.9	-0.3	-1.6	-1.9
65	157	53	21.5019	-1.8	-2.7	-2.7	-2.9	-2.525	-1.3	-1.4
82	148	67	30.588	-3.5	-2.9	-1.6	-0.8	-2.2	-2.4	-2.3	y
89	150	50	22.2222	-2.1	-1.8	-1.5	-0.9	-1.575	-2.5	-0.3
86	155	70	29.1363	-3.6	-3.1	-4.1	-2.9	-3.425	-3.9	-4.7
70	161	63	24.3046	-2.1	-2	-1.3	-1.4	-1.7	-0.8	-0.5
74	167	75	26.8923	-2.7	-2	-1.3	-1.2	-1.8	-0.9	-1.3	y
80	149	49	22.0711	-2.6	-2.3	-1.7	-1.6	-2.05	-0.5	-0.8
85	150	55	24.4444	-2.5	-3.9	-3.9	-3	-3.325	-2.8	-2.5	y
80	157	65	26.3702	-2.2	-2.5	-3.8	-3.6	-3.025	-1.6	-1.4	y
69	153	73	31.1846	-0.1	-0.4	-5.3	-4.1	-2.475	-1.8	-1.7
84	145	45	21.4031	-2.7	-4.1	-3.5	-3.6	-3.475	-2.7	-2.3	y
77	158	72	28.8415		-0.8	-0.1	0.4	-0.166667	-1.7	-2.2
88	150	45	20	-0.5	-1.1	-2.2	-1.5	-1.325	-2.2	-2.9
92	145	40	19.025	-1.1	-2.4	-2	-2	-1.875	-1.9		y
72	147	54	24.9896	-2.8	-2.4	-2.3	-2.3	-2.45	-2	-2.7
71	152	53	22.9398	-2.1	-2.5	-2.6	-2.5	-2.425	-2.5	-2.4
76	150	52	23.1111	-1	-3	-2.5	-1.8	-2.075	-1.8	-2.1	y
88	155	80	33.2986	0.6	-0.7	0.4	1.3	0.4	-1.7	-2.4	y
69	159	64	25.3155	-2.4	-2.3	-1.7	-1.7	-2.025		-2.3
89	162	65	24.7676	-0.6	-2.5	-1.6	-2.2	-1.725	-3.3	-2.9
75	151	58	25.4375	-1.3	-2.9	-2.6	-1.4	-2.05	-2.1	-1.4
93	150	43	19.1111	-4.4	-5.4	-4.3	-4.2	-4.575	-3.3	-3.8
87	162	52	19.8141	-1.1	-2.5	-2.1	-0.5	-1.55	-0.9	-0.5
80	157	58	23.5304	-2	-1.9	-1.4	-0.8	-1.525	-2.1	-2.2	y
90	146	52	24.3948	-3.7	-3.8	-2	-0.9	-2.6	-3.1	-2.9	y
94	147	62	28.6917	-5.4	-5.2	-4.8	-4.2	-4.9	-3.5	-3.4	y
80	152	69	29.865	-0.6	-2.2	-4	-1.8	-2.15	-2.6	-2.3
67	160	68	26.5625	-0.5	-2.2	-1.6	-2.6	-1.725	-1.5	-1.7
74	158	55	22.0317	-2	-1.4	-1.5	0	-1.225	-1.3	-1.5
90	158	65	26.0375	-0.5	0.5	0.8	0.6	0.35	-2.9
86	146	53	24.864	0.6	-0.9	-1.3	0.3	-0.325	-2.3	-2.7
66	156	51	20.9566	-0.6	-0.5	0.6	0.5	0	-0.2	0
83	150	58	25.7778	-3.5	-3.6	-2.9	-3.6	-3.4	-1.4	-1.1	y
73	160	62	24.2188	-1.9	-2.3	-0.7	-0.6	-1.375	-1.1	-1
71	157	61	24.7475		0.5	2	2.1	1.53333	0.2	-0.1
77	146	47	22.0492	-2.5	-2.8	-4	-2.9	-3.05		-3.9	y
77	152	60	25.9695	-1.7	-1.4	-1.5	-1.4	-1.5	-3.5		y
67	160	61	23.8281	0.4	0.7	1.8	0.9	0.95	-1.4	-1.6
90	160	66	25.7812	-4	-3.2	-2	-2.2	-2.85	-2.4	-2.1
69	164	58	21.5645	-2.4	-1.4	-0.1	-0.3	-1.05		-2.9
73	156	78	32.0513	-3.1	-3.1	-2.3	-2.4	-2.725	-1.6	-1.8
68	156	40	16.4366	-4.1	-3.6	-4.3	-4.1	-4.025	-3.9	-5.9
80	153	67	28.6215	-0.6	-1.7	-2.1	-2.8	-1.8	-1.2	-1.3
87	148	45	20.5442	-4.3	-5.2	-5.2	-3.6	-4.575	-3.2	-3.3
65	145	50	23.7812	-2.5	0.4	1.3	-1.6	-0.6	-2.4	-3	y
80	150	46	20.4444	-2.1	-2.1	-1.5	-1.8	-1.875	-0.9	-1.1
87	148	38	17.3484	-2.1	-3.2	-2.5	-2.5	-2.575	-4.2		y
70	153	46	19.6506	-3.3	-3.8	-2.9	-1.5	-2.875	-1.5	-1.7
73	152	52	22.5069	-0.9	-0.7	0.2	-0.1	-0.375	-2	-1.6	y
67	163	56	21.0772	-2.7	-4.1	-4	-3.1	-3.475	-3.1	-2.8
75	150	57	25.3333	-0.5	0.1	0.3	0.9	0.2	0.4	0.6
69	158	81	32.4467	-0.2	-0.8	1	1.3	0.325	-0.8	-0.4	y
65	153	53	22.6409	-1.1	-2.1	-1	-1.3	-1.375	-1.8	-2
83	150	52	23.1111	-1.8	-2.2	-2.3	-3.3	-2.4	-1.5	-2.8
86	144	46	22.1836	-1.7	-2.4	-3.5	-0.5	-2.025	-0.1	0.2	y
66	150	52	23.1111	-2.7	-3.7	-5	-4	-3.85	-2.1	-3.1
71	158	58	23.2335	-1.9	-2.5	-1.3	-1.2	-1.725	-0.8	-0.8
65	148	39	17.805	-4.3	-4.8	-3.8	-3.7	-4.15	-3	-2.5
76	156	52	21.3675	-2.4	-4	-4.2	-2.4	-3.25	-2.5	-2.6
84	155	48	19.9792	-4.1	-4.7	-5.3	-4.5	-4.65	-3.4	-2.9
83	150	65	28.8889	-0.5	-0.4	-0.4	-0.1	-0.35	-1.2	-0.2	y
70	148	60	27.3923	-4.3	-5	-4.6	-4.1	-4.5	-2.6	-2.5	y
79	165	62	22.7732	-3.2	-4.1	-3.4	-3.3	-3.5	-3.7	-3.3
69	148	61	27.8488	-1.6	-0.2	-0.2	-5.1	-1.775	-2.5	-2.3
76	148	49	22.3703	-2.8	-2.8	-1.8	-1.4	-2.2	-1.8	-1.5	y
84	153	72	30.7574	-1.2	-0.8	-0.5	0.7	-0.45	-0.8	-0.8
76	158	49	19.6283	-1.1	-3.1	-3.4	-3.8	-2.85	-3.2	-3.5
69	155	90	37.461	-0.9	-1.7	-3.2	-2.6	-2.1	-1.9	-1.7
93	150	66	29.3333	-4.2	-4.6	-3.5	-3	-3.825	-2.9	-2.5
85	146	43	20.1726	-5.4	-5.6	-4.4	-4.3	-4.925	-3.5	-3.7
77	159	72	28.4799	-0.1	-1.1	-0.3	-1.1	-0.65	-1.4	-1.7
94	159	68	26.8977	-0.6	-3.4	-1.9	-1.2	-1.775	-2.6	-5.8	y
87	150	50	22.2222	-3.2	-3.8	-3.7	-3.8	-3.625	-3.2	-2.6
69	154	59	24.8777	-0.1	-1.5	-0.1	-1.2	-0.725	-0.7	-1.8
85	145	59	28.0618	-4.4	-3.9	-3.1	-0.6	-3		-3	y
75	138	57	29.9307	-2.8	-3.8	-3	-3	-3.15	-2	-1.7
80	162	74	28.1969	0.9	-1.1	0.1	-1.2	-0.325	1.2	-0.6
68	152	68	29.4321	-0.1	0.5	1.2	1.5	0.775	-0.8	-0.7
82	150	60	26.6667	-1.8	-1.3	-0.9	-1.2	-1.3	-1.8	-1.9	y
73	158	62	24.8358	-1.1	-3.7	-1.6	-2	-2.1	-2.5	-2.5
70	155	59	24.5578	-1.7	-2.4	-2	-2.2	-2.075	-1.5	-1.1
69	146	38	17.827	-4.7	-4.9	-4.5	-4.5	-4.65	-3.6	-3.5
65	162	69	26.2917	-3.2	-2.7	-2.3	-1.9	-2.525	-1	-1.2
69	145	62	29.4887	-2	-1.9	-1.3	-1.2	-1.6	-0.8	-1
73	142	47	23.3089	-4.2	-3.5	-3.4	-3.9	-3.75	-2.8	-3.1
66	143	50	24.4511	-3.1	-3.1	-2.5	-2.5	-2.8	-1.8	-1.3
70	149	45	20.2694	-2.7	-3.5	-2.7	-2.7	-2.9	-1.8	-1.9
68	156	53	21.7784	-2.6	-3.3	-2.4	-2.6	-2.725	-1.7	-1.9
73	148	56	25.5661	-3.2	-3.8	-2.7	-1.7	-2.85	-2.1	-1.8
77	148	60	27.3923	-2.4	-3	-1.8	-1.1	-2.075	-2.2	-2	y
78	148	51	23.2834	-2.4	-3.1	-1.8	-0.9	-2.05	-0.8	-1	y
70	150	67	29.7778	-3.6	-3.8	-2.6	-1.9	-2.975	-2.8	-1.5
75	159	61	24.1288	-3.6	-3.8	-2.7	-1.2	-2.825	-1.6	-2.1
70	135	54	29.6296	-3.3	-3.6	-4.4	-4	-3.825	-2.8	-2.4
73	151	58	25.4375	-2.7	-3.2	-1.8	-1.6	-2.325	-2.3	-2
67	155	51	21.2279	-2.6	-1.8	-1.2	-0.6	-1.55	-2	-1.9
80	141	44	22.1317	-5.7	-6.3	-5.4	-5.3	-5.675	-4.4	-4.8
77	154	68	28.6726	-3.1	-4.5	-2.5	-2.3	-3.1	-2.6	-2.8	y
66	158	57	22.8329	-2.6	-2.4	-1.9	-1.2	-2.025	-2.2	-2.3	y
68	162	65	24.7676	-2.1	-1.2	-0.8	-1	-1.275	-0.9	-1.3
72	160	56	21.875	-2.5	-3.5	-3	-3.2	-3.05	-3	-3
80	160	59	23.0469	-4.2	-4.5	-3.9	-3.5	-4.025	-1.6	-2.6
65	154	43	18.1312	-3	-3.3	-3.4	-3.1	-3.2	-2.9	-3
68	154	65	27.4077	-1.3	-1.6	-1.5	-1.1	-1.375	-0.5	-0.8
71	155	42	17.4818	-2	-2.2	-1.2	-0.4	-1.45	-2.1	-2.3
72	157	59	23.9361	-1.9	-2.5	-2.4	-1.8	-2.15	-1.3	-1.6
74	153	57	24.3496	-1.8	-1.8	-1.2	-1.2	-1.5	-1.7	-1.4
65	149	58	26.1249	-1	-0.5	-0.4	-1.2	-0.775	-1.1	-1.2
65	157	48	19.4734	-2.6	-3.9	-3.7	-3.7	-3.475	-3	-3.1
84	152	45	19.4771	-2.5	-3.4	-2.8	-2.4	-2.775	-3.2	-3.3
80	163	59	22.2063	-3.6	-3	-1.5	-1.6	-2.425	-1.3	-1.4
91	136	53	28.6548	-1.9	-2	-1.3	-1.3	-1.625	-1.7	-1.4
66	158	52	20.83	-2.5	-2	-1.2	-1.2	-1.725	0.2	0.5
85	156	56	23.0112	-0.9	-1.8	-1.2	-0.9	-1.2	-1.4	-1.2
81	145	60	28.5375	-2	-2.7	-1.1	0.5	-1.325	-2	-1.8	y
86	158	46	18.4265	-2.8	-3.4	-3.1	-4.1	-3.35	-3.1	-2.9
85	150	52	23.1111	-0.8	-2.2	-2.6	-1.2	-1.7	-2.2	-2.5
79	146	48	22.5183	-3.5	-4.2	-3.3	-3	-3.5	-2.7	-2.4
75	147	69	31.9311	-3.3	-4.4	-4.3	-3.8	-3.95	-3	-3
67	153	54	23.0681	-4.3	-4	-2.4	-3.4	-3.525	-2	-1.6
78	156	71	29.1749	-2.9	-2.9	-1.1	-1	-1.975	-1.8	-2.1
83	148	53	24.1965	-4.3	-3.6	-3.9	-3.5	-3.825	-2.5	-2.3
92	145	60	28.5375	-1.7	-2.9	-1.9	-2.7	-2.3	-2	-2.8
83	148	62	28.3053	-3.6	-4.5	-3.5	-2.8	-3.6	-2.2	-2.2
68	157	60	24.3418	-3.6	-3.4	-3.5	-1.7	-3.05	-2	-1.7
69	155	62	25.8065	-1.9	-2.3	-1.6	-1.3	-1.775	-2.2	-2.2
68	158	93	37.2536	5.1	3.6	6.1	7.4	5.55	2.2	3.5	y
79	150	60	26.6667	-3.3	-3.3	-3.3	-3.6	-3.375	-2.8	-4.1	y
65	150	70	31.1111	-2.5	-2.5	-1.5	-0.6	-1.775	-1.5	-2.3
96	146	54	25.3331	-3.6	-4	-2.7	-2.7	-3.25	-3.6	-3.5
87	156	51	20.9566	-2.1	-2.3	-1.8	-2.4	-2.15	-2.5	-2.4
68	153	58	24.7768	-2.2	-2.7	-2	-2.2	-2.275	-1	-1
66	156	65	26.7094	-2.8	-2.4	-2.3	-1	-2.125	-2.1	-1.7
68	154	62	26.1427	-2	-3.1	-2	-2.2	-2.325	-1.7	-1.2
82	143	46	22.495	-2.3	-2.9	-0.8	-0.8	-1.7	-0.4	-0.4
68	150	44	19.5556	-3.7	-3.9	-3.4	-3.8	-3.7	-2.7	-3
71	154	50	21.0828	-3.1	-4.4	-3.6	-2.9	-3.5	-1.8	-2
84	150	64	28.4444	-3.4	-2.7	1	1	-1.025	-3.4	-3.2
72	154	51	21.5045	-2.5	-2.7	-2	-2	-2.3	-2.3	-2.3
84	146	46	21.58		-4.8	-3.8	-2.7	-3.76667	-3	-3.3
89	150	45	20	-3.2	-3.8	-2.9	-3.1	-3.25	-2.3	-2.5	y
82	150	57	25.3333	-1.4	-1.8	-1.2	-1.5	-1.475	-2.8	-3.5
72	166	73	26.4915	-2.1	-2.4	-1.5	-1.7	-1.925	-0.2	-0.1
69	148	63	28.7619	-1.5	0.1	-0.3	-1.3	-0.75	-1.3	-1
80	130	40	23.6686	-9.3	-9.6	-8.6	-8.5	-9	-3.6	-3.6
73	158	68	27.2392	0.7	-1.2	-0.2	0.9	0.05	-1.4	-1.6
65	152	67	28.9993	-1.7	-2.9	-2.4	-1.6	-2.15	-1.6	-1.3
78	148	59	26.9357	-2.3	-3	-1.9	-2.3	-2.375	-2.1	-2.1	y
67	150	74	32.8889	-0.4	-0.6	-0.1	0.1	-0.25	0.7	0.8	y
86	150	51	22.6667	-1.8	-2.8	-2.9	-1.8	-2.325	-1.6	-1.7	y
92	155	51	21.2279	0.1	0.2	-2.8	-1.3	-0.95	-1.6	-1.8	y
81	149	58	26.1249	-3.5	-4.1	-3.1	-3.2	-3.475	-2.1	-2.1
69	159	53	20.9644	-3.5	-4.1	-2.8	-2.6	-3.25	-2.4	-2.2
79	151	58	25.4375	-3.4	-3.4	-3.5	-2.6	-3.225	-2.6	-2.5
81	147	48	22.213	-3.8	-3.3	-2.8	-1.9	-2.95	-2.2	-2.4
81	155	62	25.8065	-0.1	0.6	2	1.8	1.075	0.8	1
74	158	66	26.4381	-0.1	-1.8	-0.8	-0.5	-0.8	-2.1	-1.8
67	155	50	20.8117	-2.2	-3.2	-2.6	-1.9	-2.475	-0.8	-0.3
72	155	58	24.1415	-2.5	-3.5	-2.7	-2.2	-2.725	-0.6	-1
65	155	52	21.6441	-3.1	-3.3	-2.9	-2.6	-2.975	-1.5	-1.5
74	151	64	28.0689	-1.1	-1.8	0.4	1.6	-0.225	-0.8	-0.7	y
81	151	68	29.8233	-2.7	-3.6	-2.7	-1.1	-2.525	-2.2	-2.3	y
66	164	76	28.257	-2.2	-2.2	-1.3	-2.6	-2.075	-0.4	-0.6
83	147	50	23.1385	-4.1	-4.1	-2.4	-1	-2.9	-4	-1.7
86	150	53	23.5556	-2.4	-1.7	-4.1	-2.4	-2.65	-1.7	-2.1
85	169	65	22.7583	-3.3	-0.9	-0.9	-1.4	-1.625	-2.9	-3
89	160	50	19.5312	1.4	0.7	-1.8	-2.4	-0.525	-3.7	-3.7
84	156	41	16.8475	-3.6	-3.8	-3.3	-3.4	-3.525	-1.8	-2
81	156	55	22.6003	-1.9	-2.5	-1.1	-0.9	-1.6	-2.6	-2.2
70	159	65	25.711	0.4	-0.4	0.6	0.3	0.225	-1.5	-1.2	y
81	153	56	23.9224	-3.2	-3.7	-2.2	-0.5	-2.4	-0.8	-0.7
76	158	50	20.0288	-2.5	-3	-2.9	-2.4	-2.7	-2.1	-2	y
69	150	55	24.4444	-3.1	-3.4	-2.8	-2.4	-2.925	-1.2	-0.9
67	152	58	25.1039	0.2	0.4	1.8	1.8	1.05	1.3	1.5
84	154	60	25.2994	-2.4	-2.9	-2.1	-3.2	-2.65		-2.3	y
74	149	45	20.2694	-3.4	-4.2	-3.1	-2.5	-3.3	-2.9	-2.7	y
70	152	71	30.7306	-1.6	-1.1	-1.2	-0.8	-1.175	-2.6	-3
77	155	54	22.4766	-2.9	-3.2	-1.2	-0.3	-1.9	-3	-2.8
76	155	55	22.8928	-1.4	-1.6	-0.9	-2.7	-1.65	-1	-1.8
70	158	60	24.0346	-2.7	-3.7	-2.6	-1.8	-2.7	-2.3	-2.3
83	154	48	20.2395	-4	-4.4	-3.6	-4.2	-4.05	-3.7	-3.1
91	155	52	21.6441	-3.3	-4.2	-3.5	-2	-3.25	-3.4	-4.1	y
80	143	43	21.0279	-1.8	-2.7	-2.3	-2.1	-2.225	-1.6	-2.1
66	156	59	24.2439	-2.6	-1.3	-1	-1	-1.475	-1.1	-1
66	151	53	23.2446	-1.9	-1.2	-1.3	-1	-1.35	-0.6	-0.3
77	156	54	22.1893	-2.1	-2.8	-1.7	-0.7	-1.825	-1.9	-2.1	y
76	155	50	20.8117	-3.3	-2.7	-1.1	-1.5	-2.15	-1.7	-1.7
76	150	62	27.5556	-2.6	-2.9	-2.6	-1.4	-2.375	-0.3	-2	y
75	150	52	23.1111	-2.7	-3.1	-2.5	-2.5	-2.7	-2.7	-2.5
72	160	70	27.3438	-0.6	0.9	1.2	1.4	0.725	-0.9	-0.9	y
72	166	65	23.5883	-2.4	-4	-2.2	-1.4	-2.5	-1.3	-0.6	y
85	160	52	20.3125	-2	-2.3	-1	-1.4	-1.675	-2.2	-2.1
68	153	50	21.3593	-3	-2.9	-2.2	-2.5	-2.65	-1.8	-1.3	y
88	148	56	25.5661	0	-2.4	0.5	0.6	-0.325	-0.8	-0.9
81	148	60	27.3923	-1.9	-2.4	-0.8	-2.5	-1.9	-1.4	-1.2
69	157	51	20.6905	-3.4	-3.5	-2.8	-1.2	-2.725	-3	-3.4
82	148	65	29.6749	-1.9	-1.6	0.1	-0.4	-0.95	0.6	0.1
72	152	48	20.7756	-3.4	-4.1	-3.4	-4.2	-3.775	-1.9	-2.3
65	145	49	23.3056	0.4	-2	-1.3	0.2	-0.675	-0.5	-0.1
72	145	51	24.2568	-3.4	-2.1	-2.2	-2.6	-2.575	-1.7	-1.8	y
83	155	56	23.3091	-2.3	-3.7	-3.3	-2.5	-2.95	-0.6	1.1	y
67	155	51	21.2279	-0.2	-0.7	-0.5	-1.3	-0.675	-0.2	-0.1	y
70	155	56	23.3091	-1.6	-2.2	-0.7	-0.9	-1.35	-1.3	-0.9
77	142	47	23.3089	-3.4	-3.9	-3.6	-2.5	-3.35	-1.6	-1.9
82	148	58	26.4792	-0.9	-2.5	-2.1	-0.9	-1.6	-0.8	-0.6
80	155	57	23.7253	-2	-2.6	-2.1	-1.1	-1.95	-2.2	-2.1
83	155	54	22.4766	-3.1	-3.6	-3	-2.8	-3.125	-2.6	-2.5
84	156	80	32.8731	-2	-2.7	-2.4	-1.8	-2.225	-3	-3.3
85	148	57	26.0226	-4.1	-4	-3.9	-4	-4	-3.6	-3.8
82	148	60	27.3923	-3.4	-4.7	-4.2	-3.8	-4.025	-2.1	-2.2
67	146	42	19.7035	-3.1	-3.5	-2.9	-3.1	-3.15	-1.5	-2.1
93	152	55	23.8054	-1.5	-2.7	-2.2	-2.9	-2.325		-2.3
69	145	45	21.4031	-3.1	-3	-2.6	-2.6	-2.825	-4	-3.9
83	145	51	24.2568	-3.7	-3.8	-2.8	-3.1	-3.35	-4.6		y
78	157	62	25.1532	-3	-2.8	-2.7	-2.3	-2.7	-2.7	-2.2	y
85	150	70	31.1111	-4.4	-4.8	-4.3	-5.1	-4.65	-1.8	-2.3	y
84	158	60	24.0346	-3.7	-4.6	-3.9	-3.5	-3.925	-3.9	-3.8
74	150	53	23.5556	-3.4	-4	-5.1	-4.3	-4.2	-1.8	-2.5
87	150	65	28.8889	-1.7	-0.5	-2.2	-3.4	-1.95	-5.2	-3.3
87	145	40	19.025	-1.3	-1.9	-1.5	-1.7	-1.6	-1.1	1.4
91	152	55	23.8054	-1.3	-1.9	-1.1	-1.9	-1.55	-2.1	-2.2
93	155	65	27.0552	-4.7	-5.1	-4.2	-3	-4.25	-3.9	-3.4
86	148	53	24.1965	-4.4	-4.5	-3.9	-3.2	-4	-3	-3.1	y
77	158	56	22.4323	-4.1	-4.7	-4.9	-5.1	-4.7	-3.6	-3.5	y
75	148	70	31.9576	-2.8	-1.6	-2.7	-3.2	-2.575	-1.2	-1.4	y
93	150	40	17.7778	-0.5	-4	-4.9	-4.1	-3.375	-3.2	-4
86	151	48	21.0517	-4.6	-5.1	-5.4	-4.9	-5	-3.9	-4
77	155	62	25.8065	-2.1	-3.5	-2.9	-3.2	-2.925	-3	-2.9
77	157	57	23.1247	-4.1	-4.8	-3.6	-3.6	-4.025	-3.8	-3
86	153	58	24.7768	-2.4	-1.5	-1.7	-0.4	-1.5	-2.7	-2.8
69	161	58	22.3757	-2.7	-2.4	-1.9	-1.3	-2.075	-2.4	-2.3
67	158	58	23.2335	-0.1	1.2	1.8	2.3	1.3	0.1	0.3	y
81	155	46	19.1467	-1.8	-2.3	-0.3	0.3	-1.025	-2	-2
95	155	54	22.4766	-2.7	-3	-2.4	-2.6	-2.675		-3.1
74	155	45	18.7305	-2.8	-2.4	-1.6	-1.7	-2.125	-2.7	-2.1
73	148	43	19.6311	-4.4	-4	-4.3	-3.7	-4.1	-2.3	-2.4
71	160	60	23.4375	0	-0.6	-1	-1	-0.65	-2.9	-3.1
71	150	61	27.1111	-1.5	-0.7	1.2	-0.6	-0.4	-1.1	-1.4
83	150	51	22.6667	-3.5	-2.6	-1.3	-2	-2.35	-3	-3.3	y
75	163	90	33.8741	-1.1	-1.8	-1.7	-1.7	-1.575	-1.7	-1.4
91	150	50	22.2222	-3.1	-3.2	-4.7	-3.7	-3.675	-3.2	-2
66	160	68	26.5625	-2.5	-2	-0.3	-1.2	-1.5	0.3	0.3	y
81	150	65	28.8889	-1.6	-2	-1.9	-1	-1.625	-0.9	-1.4	y
80	152	42	18.1787	-3.4	-3.9	-3.2	-3.8	-3.575	-3.2	-3.1
73	161	64	24.6904	-2.3	-2.5	-3.2	-3.2	-2.8	-3.2	-2.6
99	160	55	21.4844	-3.9	-4.2	-4.1	-3.5	-3.925	0.7	-2.8
80	165	65	23.8751	-1.7	-2	-1	-0.3	-1.25	-0.7	-0.1	y
91	150	60	26.6667	-4.7	-4	-4	-3.9	-4.15	-4.5	-3.7
82	150	52	23.1111	-3.2	-4.1	-3.6	-2.2	-3.275	-2	-2.2
71	159	46	18.1955	-3.4	-3.5	-2.7	-2.5	-3.025	-2.2	-2.3
72	155	56	23.3091	-2.3	-2.4	-1.9	-2	-2.15	-2	-2.4
73	158	73	29.2421	-3	-4.1	-2.8	-1.2	-2.775	-1.7	-2.4
76	162	85	32.3884	1	1.3	4.4	2.3	2.25	2.3	0.8
86	149	50	22.5215	-3.1	-3.9	-4.2	-3.3	-3.625	-2.9	-2.8
66	156	55	22.6003	-1.3	-1.5	-0.8	-0.7	-1.075	-1.9	-1.7
71	150	58	25.7778	-3.5	-3.6	-2.9	-3.5	-3.375	-2.8	-2.9
67	148	66	30.1315	0.1	-1.3	0.3	3	0.525	-0.1	-0.3	y
78	155	46	19.1467	-1.9	-2.2	-1.7	-2	-1.95	-2	-1.6
75	153	62	26.4855	0.2	1.2	1.5	1.1	1	-0.5	-0.9	y
65	152	55	23.8054	-0.7	-0.6	1.3	1.5	0.375	-0.9	-1.2
73	162	73	27.8159	-2.3	-2.9	-2	-2.3	-2.375	-1.6	-1.4	y
82	143	46	22.495	-1.7	-3.6	-3.1	-2.6	-2.75	-2.2	-2.3
69	151	49	21.4903	-2.7	-2.9	-2.2	-2.3	-2.525	-2.2	-2.2
84	155	60	24.974	-2.9	-3.3	-2.1	-1.9	-2.55	-1	-1.1	y
96	151	49	21.4903	-3.7	-4.1	-4.2	-4.1	-4.025	-4.2	-4	y
77	140	45	22.9592	-3.8	-3.9	-3.5	-2.4	-3.4	-2.6	-2.9	y
67	150	48	21.3333	-1.6	-2.4	-3.3	-4.7	-3	-2.8	-3
70	147	44	20.3619	-2.8	-3.2	-2.6	-2.6	-2.8	-2.6	-2.8
67	149	67	30.1788	-1.9	0.1	-0.3	-0.2	-0.575	-2.1	-2.3
87	150	45	20	-2.2	-3.4	-3.5	-4.2	-3.325	-2.3	-2.6
76	156	65	26.7094	-3.1	-3.6	-3.6	-2.4	-3.175	-2.3	-1.8	y
85	150	54	24	-1.2	-2.7	-3.3	-2.7	-2.475	-2.7	-2.6	y
83	137	44	23.4429	-4.2	-4.6	-4	-4.3	-4.275	-3.7	-4.5
82	151	52	22.806	-1.1	-2.7	-1.7	0.2	-1.325	-2.7	-2.3
66	155	57	23.7253	-3.9	-4.2	-4.2	-2.7	-3.75	-1.4	-1.3
82	154	55	23.1911	-1.7	-2.6	-1.8	-1.3	-1.85	-2.1	-2.3	y
68	151	54	23.6832	-2.4	-1.6	-0.7	-1.8	-1.625	-0.7	-0.4
66	151	48	21.0517	-2.2	-2.1	-1.5	-1.7	-1.875	-1.5	-1.7
76	152	56	24.2382	-0.8	-2.2	-2.7	-2.7	-2.1	0.5	-0.3
78	142	41	20.3333	-3	-4.6	-3.7	-4.3	-3.9	-3.4	-3.2
87	140	36	18.3673	-4.4	-5.7	-4.5	-4.2	-4.7	-3.4	-3.4
89	150	70	31.1111	-1.4	-0.7	0.3	0.5	-0.325	-1.7	-3.6	y
86	142	46	22.8129	-3.6	-4.6	-3.8	-2	-3.5	-2.3
77	158	56	22.4323	-2.2	-1.9	-2.2	-2.2	-2.125	-2.2	-1.4	y
85	148	50	22.8269	-2	-2.9	-2.1	-1.7	-2.175	-1.6	-2.2
89	158	40	16.0231	-4.2	-4.2	-3.3	-3.7	-3.85	-3.8	-4.3
79	141	40	20.1197	-1	-0.8	0	0.2	-0.4	-1.3	-1.6
80	148	61	27.8488	0.3	1.3	1.5	1.8	1.225	-1.6	-1.4
87	162	72	27.4348	-0.9	-0.9	-0.8	0.6	-0.5	-2.5	-1.5	y
85	152	67	28.9993	-2.2	-2.4	-1.7	-1.2	-1.875	-2.7	-3
69	160	55	21.4844	-3	-2.8	-1.4	-2	-2.3	-2.5	-2.2	y
71	150	54	24	-2.7	-2.6	-2.1	-2.4	-2.45	-1	-1.2
69	153	54	23.0681	-2.4	-2.7	-2.1	-2.9	-2.525	-2.2	-2.6
72	144	48	23.1481	-4.1	-4.6	-4.6	-4.3	-4.4	-1.4	-1.2
76	155	50	20.8117	-2.6	-3.8	-2.1	-2.7	-2.8	-3	-2.9
75	152	57	24.6711	-0.5	-1.9	-1.1	-0.6	-1.025	0	0.2	y
66	158	61	24.4352	-3.1	-2.9	-2.6	-2.6	-2.8	-2.2	-2.4
67	151	53	23.2446	-3.4	-2.6	-3.1	-2.9	-3	-1.7	-1.9
75	146	52	24.3948	-0.1	-1.2	1	-2.7	-0.75	-0.9	-1
86	154	46	19.3962	-5.6	-5.7	-5.3	-5.8	-5.6	-4.2	-6.5	y
83	146	54	25.3331	-2.7	-3.1	-2.9	-2.6	-2.825	-1.8	-1.5	y
74	156	78	32.0513	-2.3	-2.5	-1.2	-0.9	-1.725	-1.7	-1.4	y
85	137	45	23.9757	-4.1	-5	-4.6	-3.8	-4.375	-3.4	-4.4
71	150	50	22.2222	-1.1	-1.5	-1.4	-0.8	-1.2	-1.6	-1.2
89	146	33	15.4813	-0.34	-4.3	-3.8	-3.4	-2.96	-3.2	-3.4
86	146	52	24.3948	-3.1	-2.8	-3.7	-3.1	-3.175	-2.5	-2.5
87	150	45	20	-4	-4.6	-3.9	-3.2	-3.925	-2.7	-3.2
84	150	45	20	-3.6	-4.4	-3.7	-4	-3.925	-2.8	-3.1
78	150	59	26.2222	-1.4	-2.3	-2.1	-2.4	-2.05	-1.9	-1.5
66	156	68	27.9421	-1.1	0.5	0.4	1.1	0.225	-0.2	-0.4
74	154	61	25.721	-3.7	-3	-3.1	-3	-3.2	-1.5	-1.5
65	160	66	25.7812	-3.6	-4	-3.1	-3	-3.425	-1.1	-1.1
72	154	58	24.4561	-3	-4.7	-3.8	-3.3	-3.7	-2.4	-2.4
65	160	50	19.5312	-3.5	-3.8	-2.7	-3.3	-3.325	-2.3	-2
85	146	61	28.617	-1.5	-0.7	-0.4	-3.1	-1.425	-1.8	-1.7	y
65	164	60	22.3081	-3.7	-3.8	-2.7	-1.5	-2.925	-2.4	-2.2
76	156	61	25.0657	-0.8	-0.4	0.7	1	0.125	-1.8	-1.5
79	154	52	21.9261	-2.2	-1.9	-1.3	-0.8	-1.55	-2.3	-1.9	y
79	161	77	29.7056	-3.2	-3.5	-2.8	-2.7	-3.05	-1.1	-1.5	y
73	150	45	20	-3.1	-4.2	-4.3	-3.5	-3.775	-2	-1.6
70	153	50	21.3593	-3.2	-3.7	-3.6	-3.1	-3.4	-2.9	-3
72	158	50	20.0288	-2.7	-3.7	-3.1	-2.9	-3.1	-2.3	-2.7
70	152	48	20.7756	-1.4	-0.9	0	0.1	-0.55		-3
65	160	38	14.8438	-3.6	-3.2	-2.2	-2.7	-2.925	0.4	-4.6
84	153	71	30.3302	-1.2	-2.8	-1.3	0.4	-1.225	-1.2	-2.1	y
74	150	40	17.7778	-2	-1.4	-0.7	-0.8	-1.225	-2	-2.2	y
78	143	60	29.3413	-1.7	-2.3	-1.8	-0.9	-1.675	-1.9	-2
87	153	67	28.6215	-2.4	-3.4	-3.8	-3.6	-3.3	-2.3	-2.1
83	148	55	25.1096	-1.1	-1	-0.8	-1	-0.975	-1.5	-1.3
88	151	58	25.4375	0	-0.2	1.5	-0.9	0.1	-1.6	-1.6
66	153	46	19.6506	-3.4	-3.7	-2.9	-2.7	-3.175	-3.2	-3.1
67	147	55	25.4524	-1.8	-2.6	-1.9	-2.2	-2.125	-0.2	-0.3
71	153	63	26.9127	-3.2	-4.1	-4	-3.3	-3.65	-3.3	-3.4	y
65	155	60	24.974	-1.6	-1.8	-1.2	-0.2	-1.2	-0.6	0.1
76	167	54	19.3625	-3.7	-3.4	-3.6	-2.5	-3.3	-2.4	-2.8
83	146	36	16.8887	-1.9	-1.6	-2.7	-2.2	-2.1	-2	-2	y
70	155	56	23.3091	-4.2	-3.8	-2.6	-2.4	-3.25	-2.8	-3
69	155	56	23.3091	-1.9	-3	-2.6	-2.4	-2.475	-2.1	-2	y
65	155	56	23.3091	-2.5	-1.8	-1.7	-1.7	-1.925	-0.6	-1.3	y
71	156	54	22.1893	-1.6	-2.2	-1.5	-1.7	-1.75	-1.6	-1.4
76	140	52	26.5306	-3.6	-4.6	-4.5	-3.9	-4.15	-4.4	-4.1
80	142	50	24.7967	-3	-3.3	-2.4	-1.9	-2.65	-2.2	-2.9
70	165	47	17.2635	-3	-3.7	-3.3	-3.9	-3.475	-2.8	-2.9
67	150	50	22.2222	-2.6	-2.6	-0.9	-0.2	-1.575	-1.4	-1.2
93	155	75	31.2175	-4.2	-4.4	-4.4	-4.2	-4.3	-3.8	-4.1
90	147	58	26.8407	-3	-3	-2.7	-1.8	-2.625	-2.2	-2.3	y
72	156	57	23.4221	-1.1	-3.1	-3	-3.3	-2.625	-3	-2.9
74	143	45	22.006	-0.5	-4.2	-3.3	-2.3	-2.575	0	-0.1
81	147	56	25.9151	-1.2	-1.5	-0.5	1	-0.55	-0.3	-0.9	y
67	154	55	23.1911	-1.8	-1.4	-1.6	-2.8	-1.9	-1.1	-1.7
80	144	49	23.6304	-2.9	-3.2	-0.1	-2.2	-2.1	-2.4	-2.1	y
83	143	53	25.9181	-1.1	-0.9	-1.6	-0.3	-0.975	-2.6	-2.5
81	155	80	33.2986	-3.1	-1.1	0.4	-2.1	-1.475	-3.5	-3.7
83	144	48	23.1481	-2.1	-3.2	-1.8	-2.8	-2.475	-3.1	-3.1
76	149	59	26.5754	-2.8	-2.4	-2.2	-1	-2.1	-0.9	-1.3
73	147	60	27.7662	-2	-1.7	-0.9	-0.8	-1.35	-0.5	-1.2	y
67	155	50	20.8117	-3.2	-3.4	-2.5	-2.8	-2.975	-2.1	-1.9
79	145	60	28.5375	-3.2	-4.5	-3.2	-1.3	-3.05	-3.5	-3.2	y
87	170	75	25.9516	0.5	1	1.5	1.3	1.075	-1.6	-1.4
72	161	73	28.1625	-1.1	-1.5	-0.3	1	-0.475	-1.1	-1.2
68	158	85	34.049	1	1.7	2.1	2.5	1.825	0.7	0.3	y
69	156	55	22.6003	-0.5	-0.2	0.9	1.5	0.425	-0.3	-0.6	y
75	153	52	22.2137	-2.9	-2.6	-1.3	-0.9	-1.925	-1.1	-0.8
84	152	52	22.5069	-4.5	-5.2	-3.9	-3.3	-4.225	-2.9	-2.5	y
87	142	55	27.2763	-2.9	-3.7	-3.4	-1.8	-2.95	-2.8	-2.7
76	158	48	19.2277	-4.4	-4.5	-3.7	-2.6	-3.8	-2.2	-1.7
82	150	48	21.3333	-3.5	-3.9	-3.9	-4.2	-3.875	-2.8	-2.7
67	161	62	23.9188	-0.7	-0.8	-0.3	0.4	-0.35	-1.1	-0.9
89	141	38	19.1137	-5.2	-5.4	-4.7	-4.8	-5.025	-3.7	-3.5
88	160	46	17.9688	-2.3	-2.2	-1.3	-2.5	-2.075	-2.4	-2.9
77	148	52	23.74	-0.9	-1	1	-0.4	-0.325	-1.2	-1.2
81	132	62	35.5831	-3.3	-3.2	-2.9	-1.2	-2.65	-2.3	-2.7	y
75	145	52	24.7325	-1.6	-3	-3	-2.9	-2.625	-2.1	-2.3	y
69	153	66	28.1943	-2	-2.7	-1.4	-1.4	-1.875	-1	-1.5
68	156	48	19.7239	-3.4	-3.4	-3	-3.2	-3.25		-3.6
87	150	60	26.6667	-1.5	-0.2	-0.1	-0.5	-0.575		-4.5
76	145	57	27.1106	-1.6	-3.2	-2.9	-3	-2.675	-2.2	-1.6	y
70	145	59	28.0618		-2.1	-1.4	-1.7	-1.73333	-1.5	-1.6
89	150	51	22.6667	-0.8	-3	-2.8	-2.4	-2.25	-2.7	-2.1	y
89	159	55	21.7555	-2.1	-3.6	-2.8	-1.8	-2.575	-1.8	-1.7	y
67	148	45	20.5442	-2.8	-3.9	-3.9	-3.4	-3.5	-2.6	-2.5
82	148	49	22.3703	-2.3	-2.7	-2.1	-1.6	-2.175	-3.6
79	150	55	24.4444	-2	-3.1	-1.3	-0.5	-1.725	-1.8	-1.5	y
66	165	62	22.7732	0	0.1	1.2	0.5	0.45	-0.2	-0.7
75	153	70	29.903	-0.3	0.6	2.3	1.8	1.1	-0.2	-0.4	y
76	152	47	20.3428	-4.1	-4.9	-4.1	-1.8	-3.725	-2.5	-2.6	y
86	155	48	19.9792	-3.5	-4	-4.4	-4.7	-4.15	-3.8	-3.8
74	152	67	28.9993	-1	-0.3	-0.9	-0.8	-0.75	-2	-2.6	y
80	148	47	21.4573	-3.6	-3.3			-3.45	-2.8	-2.5
79	158	53	21.2306	-1.8	-3.1	-2.2	-1.1	-2.05	-1	-0.6
66	151	59	25.8761	-1.5	-1.8	-0.7	-1.3	-1.325	-0.3	-0.4	y
88	148	65	29.6749	-0.8	-2	-1.2	-0.6	-1.15	-1.1	-1.1	y
82	156	64	26.2985	-2.4	-3.2	-2.9	-2.7	-2.8	-2.7	-1.6	y
78	150	55	24.4444	-4.8	-4.1	-3.7	-2.6	-3.8	-3.6	-3.9
68	159	51	20.1733	-3.6	-3.8	-3.7	-3.6	-3.675	-2.1	-2.4
68	152	61	26.4024	-2.8	-2.7	-2.2	-1.9	-2.4	-1.5	-1.6
90	162	57	21.7193	-0.1	-0.6	0.9	2	0.55	-1.8	-2.6
81	157	70	28.3987	-1.6	-1.3	-1.2	1.4	-0.675	-1.3	-1.3	y
81	150	51	22.6667	-3.2	-3.9	-3.5	-2.8	-3.35	-1.6	-1.5
94	157	56	22.719	0.6	-0.4	0.7	-1.3	-0.1	-1.7	-0.9
81	142	55	27.2763	-3.5	-4.4	-2.5	-3.3	-3.425	-2.2	-2.4
87	143	72	35.2095	-1.7	-2.4	-0.5	0.2	-1.1	-0.5	-1.2	y
79	156	46	18.902	-4.3	-6	-4.5	-4	-4.7	-3.2	-2.9
82	155	70	29.1363	-0.4	-1.1	-1.3	-2.2	-1.25	-0.9	-1.4	y
65	152	62	26.8352	-1.4	-2.8	-2.1	-2.2	-2.125	-0.7	-1.1
71	156	57	23.4221	-1.9	-1.2	-0.3	-0.1	-0.875	0.2	0.1
87	157	70	28.3987	-3	-3.1	-2.4	-2.1	-2.65	-3.3	-2.8
70	156	52	21.3675	-2.7	-2.7	-2.4	-2.7	-2.625	-2.2	-2	y
74	163	65	24.4646	-3	-4.2	-3.6	-3.4	-3.55	-2.5	-2.4
78	147	61	28.229	-2.1	-2.8	-3.4	-2.5	-2.7	-2.3	-2.4	y
71	154	54	22.7694	-4.8	-4.9	-3.6	-3.9	-4.3	-2.1	-2.5
90	150	50	22.2222	-2	-1.4	-3	-1.8	-2.05	-2.2	-2.1
79	147	45	20.8247	-3.4	-3.9	-2.9	0.3	-2.475	-2.3	-2.9	y
67	149	52	23.4224	-2.6	-3.1	-2.5	-3.7	-2.975	0.3
79	152	45	19.4771	-2.4	-2.8	0.5	-1.7	-1.6	-1.4	-0.8
73	143	66	32.2754	-3.4	-4.7	-4.4	-2.9	-3.85	-3.1	-2.6
75	153	74	31.6118	-0.3	0.3	1.8	1.8	0.9	-1.1	-1.2	y
76	156	61	25.0657	-1.8	-2.6	-1.7	-1.3	-1.85	-1.5	-1.7
83	151	41	17.9817	-5	-5.7	-5.1	-5.4	-5.3	-3	-2.8
77	149	48	21.6206	-1.9	-2.2	-2.2	-2.2	-2.125	-2.5	-2.1
82	152	60	25.9695	-4.3	-4.6	-4	-2.9	-3.95	-2	-2.5	y
76	139	52	26.9137	-2.5	-3.8	-3.9	-3.7	-3.475	-3.2	-3.1	y
74	152	70	30.2978	1.9	0.8	2.6	2.4	1.925	-0.3	-0.2	y
65	150	74	32.8889	0.1	-0.2	3	-0.8	0.525	-0.3	-0.4
96	155	50	20.8117	-4.1	-3.6	-3.7	-3.7	-3.775	-0.8	-1	y
68	152	52	22.5069	-2.4	-2.6	-2.5	-1.4	-2.225	-2.3	-2.2
82	143	53	25.9181	-3.5	-4	-3.7	-1.9	-3.275	-4.1	-2.8
68	154	57	24.0344	-1.2	-2.6	-1.4	-4	-2.3	-1.7	-1.8	y
79	143	45	22.006	-4.6	-4.8	-5.2	-5.4	-5	-3.5	-3.1
75	161	54	20.8325	-2.8	-1	-4.1	-3.1	-2.75	-0.9	-0.1
80	150	65	28.8889	-3.1	-3.5	-2.8	-2.5	-2.975	-2.6	-1.6
82	153	69	29.4758	-1.9	-1.6	1.2	0	-0.575	-1.7	-1.2
86	143	52	25.4291	-4	-4.8	-3.9	-3.3	-4	-2.3	-2.6
75	148	48	21.9138	-2.7	-2.7	-2.3	-2.2	-2.475	-2.3	-1.6
66	155	59	24.5578	-1.6	-2.3	-1.4	-2	-1.825	-0.4	0
85	153	56	23.9224	1.4	1.2	0.7	0.9	1.05	-3.1	-2.9	y
70	158	66	26.4381	-2.8	-4	-2.8	-1.2	-2.7	-2.3	-1.8
87	158	66	26.4381	-0.7	-1.3	0.7	-0.8	-0.525	-1.8	-2.2
68	147	48	22.213	-1.8	-1.5	-1.5	-1	-1.45	-0.8	-0.7
86	146	61	28.617	-0.6	-2.1	-0.7	-3.7	-1.775		-2.5
74	143	42	20.5389	-2.7	-2.8	-1.7	-1.9	-2.275	-3.1	-2.8	y
74	161	53	20.4467	-3.1	-3.1	-1.9	-2.9	-2.75	-2	-1	y
71	158	48	19.2277	-3.5	-3.2	-3.5	-3.8	-3.5	-2	-2
74	153	60	25.6312	0.1	-2.7	-2.1	-1.4	-1.525	-1.4	-1.2
76	159	67	26.5021	-3.1	-4.4	-4.4	-4.8	-4.175	-1.9	-2
92	160	55	21.4844	-1.9	-1.2	1.1	-0.3	-0.575	-1.5	-1.3	y
69	166	62	22.4996	-2.5	-2.8	-2.1	-1.7	-2.275	-2.5	-2.5
70	156	51	20.9566	-3.1	-3.6	-2.2	-2	-2.725	-1.4	-1.3
81	145	55	26.1593	-2.8	-2.4	-1.1	-0.6	-1.725	-2.7	-2.4
70	155	52	21.6441	-4.3	-5.2	-3.2	-4.1	-4.2	-3.6	-2.5
83	162	80	30.4832	-2.9	-2.3	-1.5	-1.1	-1.95	-1.7	-2.2
89	146	50	23.4566	-1	-2	-2.9	-1	-1.725	-1.2	-1.2
88	150	63	28	-3	-3.4	-2.9	-2.7	-3	-2	-1.8
78	147	55	25.4524	-3.5	-4	-3	-3	-3.375	-3.3	-3.1
83	155	52	21.6441	-2.8	-4	-3.4	-2.2	-3.1	-2.4	-2.9	y
84	151	75	32.8933	-0.6	0	1.7	2.9	1	1.2	0.9
90	150	52	23.1111	-2.5	-4	-4.8	-3.6	-3.725	-3.5	-3.6
77	140	42	21.4286	-4.4	-5.2	-5.2	-5.1	-4.975	-3.9	-3.8
84	154	54	22.7694	0.6	-1.2	-1.3	-2.1	-1	-1.6	-1.5
75	152	57	24.6711	-3.4	-3	-2.4	-2.2	-2.75	-1.8	-2.1
83	159	65	25.711	-0.8	-2.6	-2.8	-1.7	-1.975	-0.1	-0.6
73	154	57	24.0344	-3	-3.7	-3	-3.2	-3.225	-2.2	-2
78	145	52	24.7325	-2.3	-2.3	-0.5	-0.9	-1.5	-2.1	-1.3	y
74	148	51	23.2834	-3.3	-3.2	-1.4	-1.6	-2.375	-2.1	-1.8
73	145	54	25.6837	-3.2	-3.5	-1.7	-2	-2.6	-2.8	-2
70	149	61	27.4762	-2.9	-2.9	-1.6	-2	-2.35	-2.7	-2.8
80	152	56	24.2382	-3.7	-2.9	-2.2	-2.4	-2.8	-1.5	-1.7
71	153	63	26.9127	-3.1	-3.7	-2.7	-3.2	-3.175	-2.1	-1.8	y
79	144	54	26.0417	-2.3	-2.3	-1.9	-1.2	-1.925	-1.9	0.2	y
69	159	57	22.5466	-3.5	-3.6	-3.3	-2.1	-3.125	-1.7	-2.3	y
70	168	55	19.487	-5.3	-5.5	-3.6	-4	-4.6	-1.9	-2.4
71	150	39	17.3333	-4.4	-4.4	-3.2	-3	-3.75	-2.8	-2.7
88	146	40	18.7652	-5.6	-5.4	-4.4	-4.3	-4.925	-3	-2.5
69	143	48	23.473	-2.4	-3.7	-2.3	-1.3	-2.425	-2.4	-2.8
86	140	43	21.9388	-4	-3.9	-2.4	-3.9	-3.55	-3.9	-3.5	y
83	150	64	28.4444	-3.4	-3.2	-1.6		-2.73333	-1.9	-2.4
73	157	61	24.7475	-2.2	-2.3	-1.6	-1.2	-1.825	-1.4	-0.9
85	142	56	27.7723	-3.5	-3.1	-0.6	-2.1	-2.325	-3.1	-2.3	y
73	153	51	21.7865	-4	-4.5	-4.9	-3.5	-4.225	-2.2	-2.1
73	148	58	26.4792	-2	-2.4	-2.9	-1.2	-2.125	-2.3	-1.9
76	146	53	24.864	-3.6	-3.9	-3.8	-3.6	-3.725	-2.4	-2.4
66	162	56	21.3382	-3	-3.5	-3	-2.1	-2.9	-3.2	-3.2
70	158	49	19.6283	-0.24	-2.9	-2.9	-2.3	-2.085	-2.8	-2.9
82	145	54	25.6837	-2.5	-3.8	-3.8	0.1	-2.5	-1.9	-1.7	y
70	151	47	20.6131	-3.8	-3.5	-3	-3.7	-3.5	-1.7	-1.7	y
65	158	49	19.6283	-3.7	-2.9	-2	-1.8	-2.6	-2	-2.5
68	161	48	18.5178	-1.1	-1.3	-0.8	0.2	-0.75	-0.9	-1.2
67	149	55	24.7737	-3.5	-3.6	-2.5	-3	-3.15	-1.8	-1.9
67	153	62	26.4855	-0.5	0.6	0.8	-0.4	0.125	0.7	0.8
74	147	57	26.3779	-1.5	-4.8	-4.6	-4.1	-3.75	-2.5	-2.8
66	160	58	22.6562	0.2	-1.6	-0.3	-0.7	-0.6	-0.2	-0.3	y
66	164	62	23.0518	-1.1	-2.6	-1.4	-1.6	-1.675	-1.3	-1	y
83	154	50	21.0828	-0.7	-1.1	-3.5	-4.8	-2.525	-2.4	-2.4
82	148	46	21.0007	-0.2	0.3	0.5	1.6	0.55	-0.7	-1
65	163	65	24.4646	-1.3	-1.9	-1.4	-0.7	-1.325	0.3	0.1	y
67	146	46	21.58	-2.9	-2.4	-2	-2.4	-2.425	-1.1	-0.3
81	152	56	24.2382	-3.7	-4.3	-3.4	-2.5	-3.475	-2.5	-2.6
77	153	66	28.1943	-2.7	-4.1	-3.1	-3.3	-3.3	-1.6	-1.7
86	148	61	27.8488	-1.6	-2.8	-1.3	0	-1.425	-2.9	-3	y
93	156	45	18.4911	-1.3	-4.2	-4.3	-3.2	-3.25	-1.5	-1.7
72	148	55	25.1096		-1.3	-3.8	-2.9	-2.66667	-1.8	-1.4
97	146	48	22.5183	-2.7	-2.6	-3	-1.8	-2.525	-2.9	-2.9
68	147	58	26.8407	-1.1	-1.1	-2.2	-1.4	-1.45	-2.2	-2.4	y
70	156	55	22.6003	0.1	0.3	1.2	1.1	0.675	-0.9	-0.8
82	155	55	22.8928	-1.4	-2.6	-1.9	-1.4	-1.825	-2.2	-2.6
82	148	50	22.8269	-3	-3.3	-2.7	-2	-2.75	-3	-3.1
72	150	51	22.6667	-2.1	-3.1	-1.5	-1.2	-1.975	-1.5	-1.7
65	165	75	27.5482	-2.8	-2.8	-2.5	-1	-2.275	-1.7	-1.7
70	144	47	22.6659	-0.6	-0.7	0.4	-0.2	-0.275	1.4	1.3
73	156	70	28.764	-0.8	-2.2	-1.9	-3	-1.975	0.2	0
85	154	64	26.986	-2.8	-3.7	-2.3	-1.1	-2.475	-1.6	-1.4
78	155	66	27.4714	-2.3	-1.9	-0.7	0.1	-1.2	-0.6	-0.7	y
72	148	57	26.0226	-3.7	-2.8	-2.4	-2.1	-2.75	-2.3	-3.1
70	154	53	22.3478	-4.5	-5.2	-4.6	-4.2	-4.625	-3.2	-2.9
73	152	50	21.6413	-2.1	-2.4	-2.5	-1.8	-2.2	-3	-3
86	153	38	16.2331	-4.6	-3.2	-3.8	-3.7	-3.825	-3.6	-3.1
65	138	57	29.9307	0.4	1.3	2.5	1.7	1.475	0.5	0.6
76	143	49	23.9621	-4.1	-4.9	-2.9	-0.8	-3.175	-2.9	-2.5
87	153	38	16.2331	-4.9	-5	-5.5	-5.6	-5.25	-1.8	-3.5
78	158	54	21.6311	-3.7	-3	-2.5	-2.3	-2.875	-1.8	-1.7	y
89	146	58	27.2096	0.2	-0.7	-0.1	1.1	0.125	-0.7	-0.4
76	150	50	22.2222	-2	-2.8	-3.6	-2	-2.6	-2.6	-2.4	y
75	148	50	22.8269	-3.4	-3.5	-3.9	-2.2	-3.25	-1.7	-0.8
69	154	55	23.1911	-2.4	-3.2	-2.8	-4.2	-3.15	-2.9	-2.9
65	158	62	24.8358	-2	-1.3	-1	-0.3	-1.15	-1.3	-0.9
70	154	62	26.1427	0.6	1.4	0.3	-2.5	-0.05	-1.5	-0.6	y
73	146	47	22.0492	-3.9	-3.2	-3	-4.2	-3.575	-2.8	-2.8
69	161	57	21.9899	-0.5	0.6	0.5	1	0.4	-0.7	-1.3
93	148	48	21.9138	-3.6	-4.8	-3.9	-3.3	-3.9		-4.7
72	153	70	29.903	-2.5	-2.3	-1.7	-2.8	-2.325	-1.4	-2	y
81	153	44	18.7962	-2.8	-2.9	-2.5	-2.6	-2.7	-2.9	-2.9
78	151	70	30.7004	-2.8	-3.1	-2.2	-1.4	-2.375	-1.6	-0.6	y
72	152	54	23.3726	-3.2	-3.4	-2.4	-2.1	-2.775	-1.3	-1.3
71	153	52	22.2137	-2.4	-1.9	-1.1	-0.4	-1.45	-2.3	-2.5
80	144	55	26.5239	-1.2	-1.6	-1.1	-3.3	-1.8	-2.2	-2.4
88	155	48	19.9792	-4.1	-5.6	-3.8	-1.4	-3.725	-3.6	-3.6
77	156	58	23.833	-2	-1.4	-1	-5.7	-2.525	-2	-1.7
71	158	62	24.8358	-3.3	-3.4	-3.6	-3.4	-3.425	-2.5	-2.4
72	145	54	25.6837	-0.2	-0.2	0.1	1.1	0.2	-1.6	-1.7	y
73	150	56	24.8889	-2.9	-4.1	-3.3	-2.6	-3.225	-1.3	-1.6
86	155	50	20.8117	-2.5	-3.1	-2.7	-2.4	-2.675	-2	-1.7	y
67	151	50	21.9289	-2.4	-1.9	-1.3	-1.2	-1.7	-1.9	-2.1
82	151	85	37.2791	0	-1.6	0.5	0.3	-0.2	-1.8	-1.8
81	154	55	23.1911	-2.2	-2	-1.5	-1	-1.675	-2.3	-2.3	y
79	150	69	30.6667	-2.8	-2.4	0.5	0.7	-1	-2.6	-1.3	y
71	146	48	22.5183	-1.2	-2.1	-0.8	-0.8	-1.225	1.8	-1
66	157	58	23.5304	-3.9	-4.2	-4	-3.4	-3.875	-2	-2
											176
